# Supplementary material for: Preliminary screening of the aqueous extracts of twenty-three different seaweed species in Sri Lanka with in-vitro and in-vivo assays
Source: PubMed Central journal article supplement — Heliyon. 2020 Jun 5;6(6):e03918. doi: 10.1016/j.heliyon.2020.e03918 (PMC7283164; doi:10.1016/j.heliyon.2020.e03918), 2020-06-05
Supplement: mmc1.pdf [file mmc1.pdf]

**A**

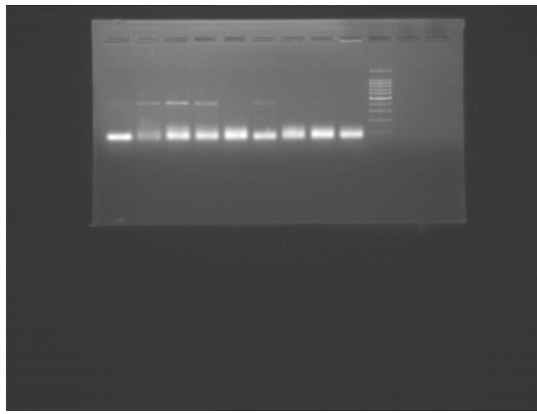

**A; Transforming Growth Factor- $\beta$  (TGF- $\beta$ )** expression during the wound healing of treatment and control (Ratios of TGF- $\beta$  on 3,6,9 and 12 days post injury treatment and control).

**B**

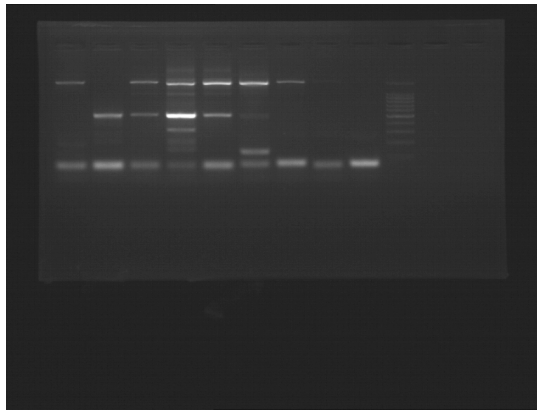

**B; Tumor Necrosis Factor (TNF- $\alpha$ )** expression during the wound healing of treatment and control (Ratios of TNF- $\alpha$  on 3,6,9 and 12 days post injury treatment I and control).

**C**

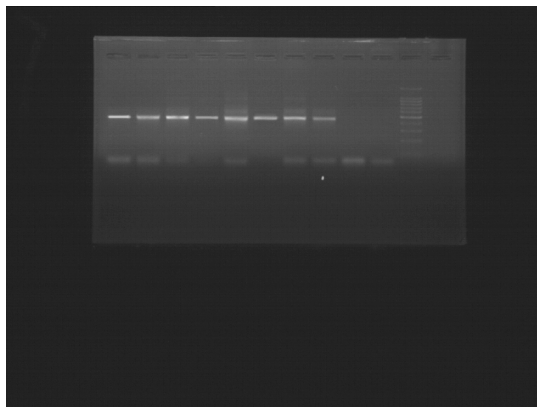

**C;  $\beta$ -Actin** expression during the wound healing of treatment and control (Ratios of  $\beta$ -Actin on 3,6,9 and 12 days post injury treatment I and control).
